# Supplementary material for: A combined approach of electronic spectroscopy and quantum chemical calculations to assess model membrane oxidation pathways
Source: Royal Society of Chemistry journal article supplement (doi:10.1039/d1nj03685h), 2021-01-01
Supplement: d1nj03685h1.pdf [file d1nj03685h1.pdf]

1  
2  
3 **A COMBINED APPROACH OF ELECTRONIC SPECTROSCOPY AND**  
4 **QUANTUM CHEMICAL CALCULATIONS TO ASSESS MODEL MEMBRANES**  
5 **OXIDATION PATHWAYS**

6  
7 **J.M. Faroux<sup>a</sup>, A. Borba<sup>b</sup>, M.M. Ureta<sup>a</sup>, E.E. Tymczyszyn<sup>c</sup>, A. Gomez-Zavaglia<sup>a\*</sup>**  
8

9  
10 <sup>a</sup>Center for Research and Development in Food Cryotechnology (CIDCA, CCT-CONICET La Plata) RA1900, La  
11 Plata, Argentina

12 <sup>b</sup>CIEPQPF - Department of Chemical Engineering, University of Coimbra, P-3030-790 Coimbra, Portugal

13 <sup>c</sup>Laboratorio de Microbiología Molecular - Departamento de Ciencia y Tecnología - Universidad Nacional de Quilmes,  
14 Bernal, Buenos Aires - Argentina

15  
16  
17 **ELECTRONIC SUPPLEMENTARY INFORMATION**  
18  
19

---

\*Corresponding author: Andrea Gómez-Zavaglia

Address: Calle 47 y 116 La Plata, Buenos Aires. Argentina (1900)

Telephone: +54(221)4890741

Fax: +54(221)4249287

E-mail: angoza@qui.uc.pt

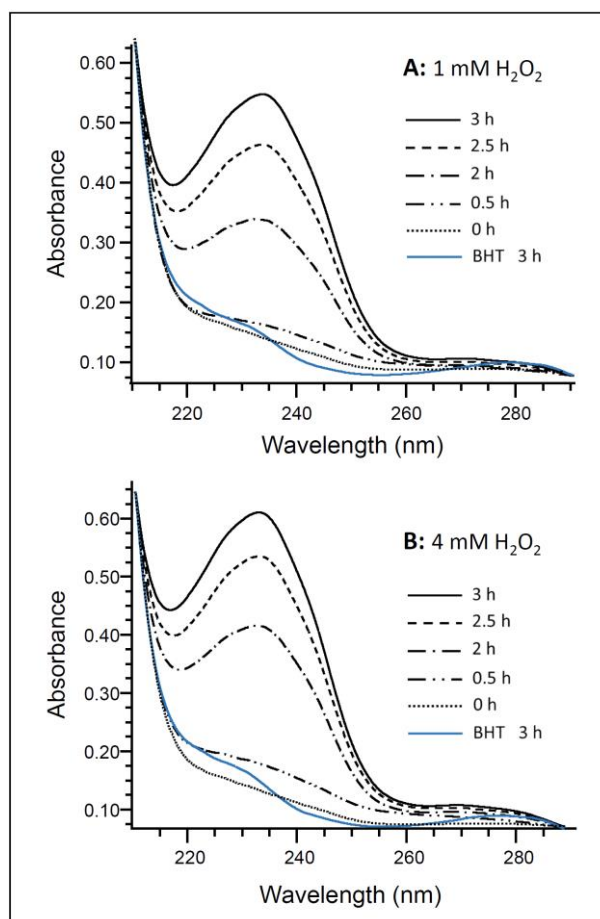

21

22

23

24

25

26

27

**Fig. ESI 1** Raw UV spectra of lipids exposed to H<sub>2</sub>O<sub>2</sub> for: 0 hours (dot line); 0.5 hours (dash dot dot line); 2 hours (dash dot line); 2.5 hours (dash line); 3 hours (full line). Blue spectra correspond to liposomes containing BHT and exposed for 3 hours to H<sub>2</sub>O<sub>2</sub>. A. 1 mM H<sub>2</sub>O<sub>2</sub>; B. 4 mM H<sub>2</sub>O<sub>2</sub>.

| Proposed pathways <sup>a</sup> | Compounds | Structure |
|--------------------------------|-----------|-----------|
| Initial compound               | LA        |           |
|                                |           |           |
| A                              | M         |           |
|                                |           |           |
|                                | N         |           |
|                                |           |           |

28  
29

| Proposed pathways <sup>a</sup> | Structure                |           |   |   |   |
|--------------------------------|--------------------------|-----------|---|---|---|
|                                | Double bond localization |           |   |   |   |
| B                              | Compounds                | A         | E | I |   |
|                                |                          |           |   |   |   |
|                                | Pathway 1                |           |   |   |   |
|                                |                          | Compounds | B | F | J |
|                                |                          |           |   |   |   |
|                                |                          | Pathway 2 |   |   |   |

30

| Proposed pathways <sup>a</sup> |           | Structure                                                                                                  |                                                                                                             |                                                                                                              |
|--------------------------------|-----------|------------------------------------------------------------------------------------------------------------|-------------------------------------------------------------------------------------------------------------|--------------------------------------------------------------------------------------------------------------|
|                                |           | 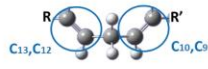<br>C13, C12      C10, C9 | <br>C13, C12      C11, C10 | <br>C12, C11      C10, C9 |
| B                              | Compounds | C                                                                                                          | G                                                                                                           | K                                                                                                            |
|                                | Pathway 3 |                           |                           |                           |
|                                |           |                           |                           |                           |
|                                | Compounds | O                                                                                                          | P                                                                                                           | Q                                                                                                            |
|                                | Pathway 4 |                           |                           |                           |
|                                |           |                           |                           |                           |
| B                              | Compounds | D                                                                                                          | H                                                                                                           | L                                                                                                            |
|                                | Pathway 5 |                         |                         |                         |
|                                |           |                         |                         |                         |

<sup>a</sup> Proposed pathways for the oxidation of linoleic acid (LA). A: Formation of conjugated dienes/trienes. B: Formation of hydroperoxides. Letters A to N denote the proposed final products. Different pathways indicate different oxidation. See Figure 4.

31

32  
33  
34  
35

**Fig. ESI 2** Optimized structures of linoleic acid (LA) and its proposed oxidation products. Different letters indicate different compounds, and different colors correspond to different routes. Outline colors correspond to the same pattern as that used in Fig. 4.

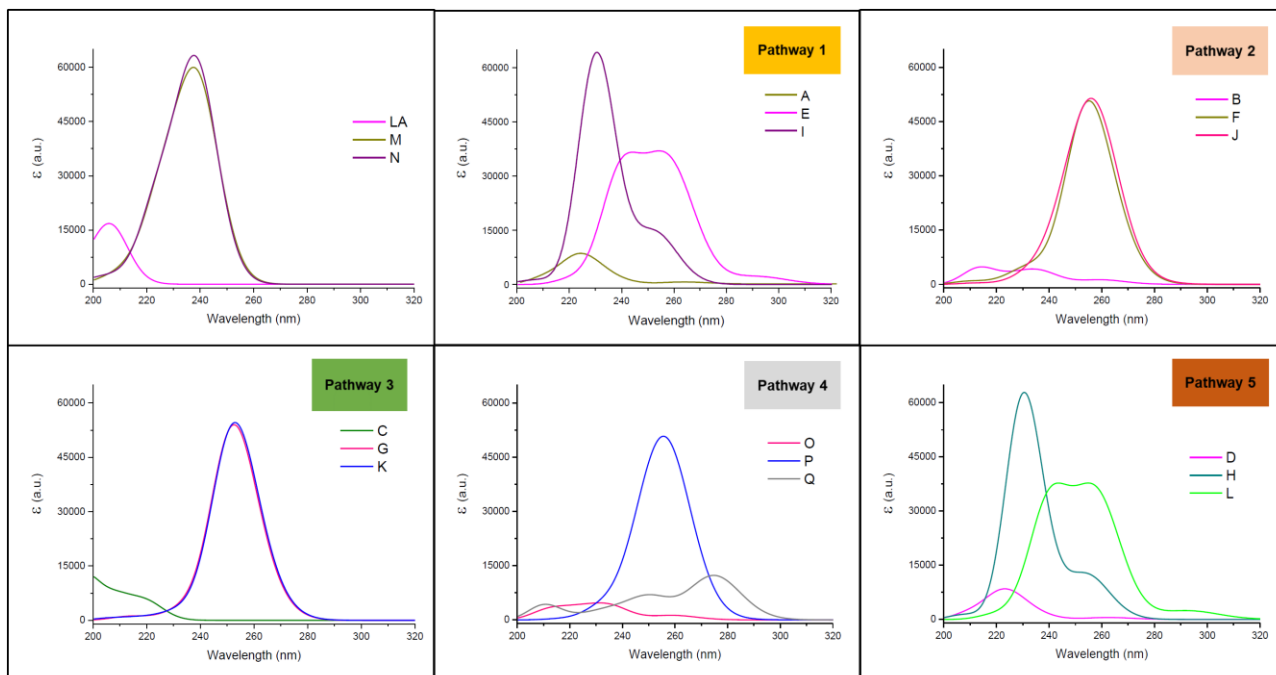

36

37

38

39

**Fig. ESI 3** Theoretical electronic spectra obtained at the DFT(B3LYP) 6-311++G(d,p) level of theory. Each panel corresponds to a different pathway.

40 **Table ESI 1** - Adjustment parameters of the dose-response behavior of the area of the  
 41 234 nm band with regard to the exposure time.<sup>a</sup>  
 42

| Parameter                                        | 1 mM H <sub>2</sub> O <sub>2</sub> | 4 mM H <sub>2</sub> O <sub>2</sub> |
|--------------------------------------------------|------------------------------------|------------------------------------|
| A <sub>min</sub>                                 | 0.1797                             | 0.3073                             |
| A <sub>max</sub> (fixed)                         | 7.7                                | 7.7                                |
| t <sub>50</sub> (50% peroxidation) (hours)       | 2.428 ± 0.028                      | 1.572 ± 0.030                      |
| Peroxidation rate (slope) (hours <sup>-1</sup> ) | 1.228 ± 0.094                      | 3.258 ± 0.221                      |
| R <sup>2</sup>                                   | 0.9982                             | 1                                  |

43 <sup>a</sup> Parameters were obtained by adjusting the experimental data from Fig. 2A, according to Eq. 1:

44 
$$A_{234} = A_{min} + \frac{A_{max} - A_{min}}{1 + (10^{(t_{50} - t)^n})}$$
 Eq. 1  
 45  
 46

**Table ESI 2** Total energy, dipole moments, polarizability, symmetry point groups and rotational constants for dienes/trienes and hydroxy fatty acids proposed as oxidation products, calculated at the B3LYP/6-311++G(d,p) level of theory.

| Proposed pathways <sup>a</sup> | Compounds <sup>b</sup> | Total Energy <sup>c</sup><br>(kJ/mol) | Dipole Moment<br>(Debye) | Polarizability ( $\alpha$ )<br>(a.u.) | Symmetry<br>(Point Group) | Rotational constant<br>(MHz) |        |       |
|--------------------------------|------------------------|---------------------------------------|--------------------------|---------------------------------------|---------------------------|------------------------------|--------|-------|
|                                |                        |                                       |                          |                                       |                           | A                            | B      | C     |
| <b>Initial compound</b>        | <b>LA</b>              | -2245915.21                           | 1.38                     | 234.17                                | C <sub>1</sub>            | 279.63                       | 63.67  | 52.45 |
| <b>A</b>                       | <b>M</b>               | -2245934.86                           | 1.56                     | 246.65                                | C <sub>1</sub>            | 550.78                       | 45.08  | 42.28 |
|                                | <b>N</b>               | -2245935.31                           | 1.56                     | 247.15                                | C <sub>1</sub>            | 1109.95                      | 39.87  | 39.23 |
|                                | <b>Pathway 1</b>       | <b>A</b>                              | -2443467.06              | 1.34                                  | 237.83                    | C <sub>1</sub>               | 264.67 | 62.39 |
| <b>E</b>                       |                        | -2443487.85                           | 2.52                     | 251.98                                | C <sub>1</sub>            | 496.39                       | 43.43  | 40.72 |
| <b>I</b>                       |                        | -2443468.60                           | 2.12                     | 248.62                                | C <sub>1</sub>            | 391.69                       | 48.52  | 43.91 |
| <b>Pathway 2</b>               | <b>B</b>               | -2443465.50                           | 3.04                     | 238.12                                | C <sub>1</sub>            | 264.21                       | 62.22  | 51.45 |
|                                | <b>F</b>               | -2443480.82                           | 2.90                     | 250.69                                | C <sub>1</sub>            | 558.30                       | 44.22  | 41.64 |
|                                | <b>J</b>               | -2443489.43                           | 1.72                     | 251.58                                | C <sub>1</sub>            | 1201.62                      | 38.40  | 37.95 |
| <b>Pathway 3</b>               | <b>C</b>               | -2443445.38                           | 2.04                     | 237.93                                | C <sub>1</sub>            | 250.30                       | 62.70  | 51.18 |
|                                | <b>G</b>               | -2443481.45                           | 2.02                     | 250.51                                | C <sub>1</sub>            | 404.05                       | 45.91  | 41.86 |
|                                | <b>K</b>               | -2443481.77                           | 2.74                     | 250.92                                | C <sub>1</sub>            | 708.39                       | 40.45  | 39.14 |
| <b>Pathway 4</b>               | <b>O</b>               | -2443466.02                           | 2.14                     | 238.29                                | C <sub>1</sub>            | 243.95                       | 64.44  | 51.95 |
|                                | <b>P</b>               | -2443489.66                           | 2.02                     | 250.88                                | C <sub>1</sub>            | 590.22                       | 43.66  | 41.59 |
|                                | <b>Q</b>               | -2443471.58                           | 2.90                     | 242.55                                | C <sub>1</sub>            | 748.18                       | 40.40  | 39.20 |
| <b>Pathway 5</b>               | <b>D</b>               | -2443466.18                           | 2.91                     | 238.05                                | C <sub>1</sub>            | 246.11                       | 64.59  | 52.26 |
|                                | <b>H</b>               | -2443468.51                           | 2.68                     | 247.31                                | C <sub>1</sub>            | 210.70                       | 68.68  | 52.85 |
|                                | <b>L</b>               | -2443487.74                           | 3.05                     | 252.42                                | C <sub>1</sub>            | 839.39                       | 40.08  | 39.25 |

<sup>a</sup>Proposed pathways for the oxidation of linoleic acid (LA). A: Formation of conjugated dienes/trienes. B: Formation of hydroxy fatty acids. Letters **A** to **N** denote the proposed final products. Different pathways indicate different oxidation reactions. See Fig. 4.

<sup>b</sup>Compounds are denoted with the same nomenclature as in Fig. 4.

<sup>c</sup>Total energy is the electronic energy, including the zero-point vibrational energy.

**Table ESI 3** Predicted vertical excitation energies and associated orbitals transitions major contributions together with oscillator strengths, *f*, for the dienes/trienes and hydroxy fatty acids proposed as oxidation products, obtained by TD-DFT at the B3LYP/6-311++G(d,p) level of theory after ground-state geometry optimization using the same functional and basis set.

| Compounds <sup>b</sup> | $\lambda_{max}^{S_0 \rightarrow S_n}$<br>(nm) | Oscillator strength<br><i>f</i> | Transition and orbitals major contributions                                                        |
|------------------------|-----------------------------------------------|---------------------------------|----------------------------------------------------------------------------------------------------|
| <b>LA</b>              | 206.76                                        | 0.1224                          | S <sub>0</sub> →S <sub>5</sub> HOMO->LUMO (12%), HOMO->L+4 (41%), HOMO->L+5 (26%)                  |
| <b>M</b>               | 240.91                                        | 0.4687                          | S <sub>0</sub> →S <sub>1</sub> HOMO->LUMO (51%), HOMO->L+1 (11%), HOMO->L+3 (13%), HOMO->L+4 (15%) |
| <b>N</b>               | 239.76                                        | 0.4646                          | S <sub>0</sub> →S <sub>1</sub> HOMO->LUMO (47%), HOMO->L+3 (35%)                                   |
| <b>A</b>               | 223.32                                        | 0.0753                          | S <sub>0</sub> →S <sub>7</sub> HOMO->L+6 (17%), HOMO->L+9 (56%)                                    |
| <b>E</b>               | 261.58                                        | 0.2208                          | S <sub>0</sub> →S <sub>2</sub> HOMO->LUMO (11%), HOMO->L+1 (36%), HOMO->L+2 (10%), HOMO->L+5 (30%) |
| <b>I</b>               | 229.81                                        | 0.3595                          | S <sub>0</sub> →S <sub>4</sub> HOMO->LUMO (15%), HOMO->L+1 (39%), HOMO->L+2 (14%), HOMO->L+4 (20%) |
| <b>B</b>               | 237.02                                        | 0.0389                          | S <sub>0</sub> →S <sub>2</sub> HOMO->L+3 (30%), HOMO->L+5 (37%), HOMO->L+6 (22%)                   |
| <b>F</b>               | 253.84                                        | 0.6091                          | S <sub>0</sub> →S <sub>2</sub> HOMO->LUMO (64%), HOMO->L+2 (16%)                                   |
| <b>J</b>               | 259.37                                        | 0.4277                          | S <sub>0</sub> →S <sub>2</sub> HOMO->LUMO (56%), HOMO->L+5 (27%)                                   |
| <b>C</b>               | 209.15                                        | 0.0660                          | S <sub>0</sub> →S <sub>4</sub> HOMO->L+1 (20%), HOMO->L+3 (28%), HOMO->L+4 (17%), HOMO->L+5 (13%)  |
| <b>G</b>               | 251.82                                        | 0.6810                          | S <sub>0</sub> →S <sub>2</sub> HOMO->LUMO (73%), HOMO->L+2 (11%)                                   |
| <b>K</b>               | 252.18                                        | 0.6924                          | S <sub>0</sub> →S <sub>2</sub> HOMO->LUMO (73%), HOMO->L+1 (10%)                                   |
| <b>O</b>               | 235.85                                        | 0.0405                          | S <sub>0</sub> →S <sub>2</sub> HOMO->L+3 (15%), HOMO->L+4 (60%), HOMO->L+5 (10%), HOMO->L+6 (10%)  |
| <b>P</b>               | 259.99                                        | 0.3570                          | S <sub>0</sub> →S <sub>2</sub> HOMO->LUMO (51%), HOMO->L+5 (36%)                                   |
| <b>Q</b>               | 274.80                                        | 0.1676                          | S <sub>0</sub> →S <sub>1</sub> HOMO->LUMO (92%)                                                    |
| <b>D</b>               | 224.52                                        | 0.0321                          | S <sub>0</sub> →S <sub>6</sub> HOMO->L+1 (16%), HOMO->L+4 (36%), HOMO->L+5 (18%), HOMO->L+7 (12%)  |
| <b>H</b>               | 229.44                                        | 0.4748                          | S <sub>0</sub> →S <sub>5</sub> HOMO->LUMO (22%), HOMO->L+1 (10%), HOMO->L+2 (21%), HOMO->L+3 (28%) |
| <b>L</b>               | 257.41                                        | 0.2965                          | S <sub>0</sub> →S <sub>4</sub> HOMO->L+1 (55%), HOMO->L+3 (11%)                                    |

<sup>a</sup> Compounds are denoted with the same nomenclature as in Fig. 4
